# Supplementary material
Source: PubMed Central journal article supplement (PMC7423576)
Supplement: mmc1.pdf [file mmc1.pdf]

1 10 20 30 40 50  
sp|P0DTC2|SPIKE\_SARS2\_Spike\_gl MFV.....FLVLLPLVSSQCVNLTTRTQLPPAYTNSFTRGVYYPDKVFRSSVLHSTQD  
sp|P59594|SPIKE\_CVHSA MFI..FLL.FLTLTSGSDLDRCTTFDDVQAPNYTQHTSSM~~RGVYYP~~DEIFRS~~DTLYLT~~QD  
tr|D2E1E7|D2E1E7\_CVHSA MFI..FLL.FLTLTSGSDLDRCTTFDDVQAPNYTQHTSSM~~RGVYYP~~DEIFRS~~DTLYLT~~QD  
tr|D2E1D2|D2E1D2\_CVHSA MFI..FLL.FLTLTSGSDLDRCTTFDDVQAPNYTQHTSSM~~RGVYYP~~DEIFRS~~DTLYLT~~QD  
tr|A0A166ZL64|A0A166ZL64\_9NIDO MFVFLISYTFILIPYTATTT~~C~~..FSGPTIENKLNIS~~SGS~~RGVYYP~~DD~~IFRS~~NVSVLVT~~G  
tr|A0A0U1UYX4|A0A0U1UYX4\_CVHSA MFVFLISYTFILIPYTATTT~~C~~..FKGPTTENKLNIS~~SGS~~RGVYYP~~DD~~IFRS~~NVSVLVT~~G  
tr|R9QTA0|R9QTA0\_CVHSA ..MILL...LFLFSSAKAQEGCGVISNKPQRTFDQY~~SSTF~~RGVYYP~~DD~~IFRS~~DVLHLT~~QD  
tr|A0A0K1Z074|A0A0K1Z074\_CVHSA MKILIF...AFLVTLVKAQEGCGVINLRTQPKLSQV~~SSSR~~RGVYYP~~DD~~IFRS~~DVLHLT~~QD  
sp|Q3LZX1|SPIKE\_BCHK3 MKLILF...AFLANLAKAQEGCGIISRKQPQKMAQV~~SSSR~~RGVYYP~~DD~~IFRS~~DVLHLT~~QD  
sp|Q3I5J5|SPIKE\_BCRP3 MKLILF...AFLASLAKAQEGCGIISRKQPQKMAQV~~SSSR~~RGVYYP~~DD~~IFRS~~NVLHLT~~QD  
sp|Q0Q475|SPIKE\_BC279 MKVLIF...ALLFSLAKAQEGCGIISRKQPQKMEKV~~SSSR~~RGVYYP~~DD~~IFRS~~DVLHLT~~QD  
tr|Q0QDX9|Q0QDX9\_CVHSA MKVLIF...ALLFSLAKAQEGCGIISRKQPQKMEKV~~SSSR~~RGVYYP~~DD~~IFRS~~DVLHLT~~QD  
tr|A0A2I4AL96|A0A2I4AL96\_9TELE .....  
tr|A0A1U7RHG6|A0A1U7RHG6\_MESAU .....  
tr|H0UY28|H0UY28\_CAVPO .....  
tr|A0A2K5QWK6|A0A2K5QWK6\_CEBCA .....  
tr|F6UG70|F6UG70\_CALJA .....

60 70 80 90 100 110  
sp|P0DTC2|SPIKE\_SARS2\_Spike\_gl LFLPF~~F~~SNVTW~~F~~HAIHVS~~G~~TNGTKR~~F~~DN~~P~~VLP~~F~~NDGVYF~~A~~ST~~E~~KSN~~I~~IRGW~~I~~FG~~T~~LD~~S~~K  
sp|P59594|SPIKE\_CVHSA LFLPF~~F~~SNVTG~~F~~H~~T~~INH.....TFGN~~P~~VIP~~F~~KDGIYF~~A~~AAT~~E~~KSN~~V~~VRGW~~V~~FG~~S~~T~~M~~N~~N~~K  
tr|D2E1E7|D2E1E7\_CVHSA LFLPF~~F~~SNVTG~~F~~H~~T~~INH.....TFGN~~P~~VIP~~F~~KDGIYF~~A~~AAT~~E~~KSN~~V~~VRGW~~V~~FG~~S~~T~~M~~N~~N~~K  
tr|D2E1D2|D2E1D2\_CVHSA LFLPF~~F~~SNVTG~~F~~H~~T~~INH.....TFGN~~P~~VIP~~F~~KDGIYF~~A~~AAT~~E~~KSN~~V~~VRGW~~V~~FG~~S~~T~~M~~N~~N~~K  
tr|A0A166ZL64|A0A166ZL64\_9NIDO RFLRF~~N~~TTLT~~W~~YNSWNQ.....AYSS~~P~~VLP~~F~~GHGVYF~~S~~TID~~K~~SN~~V~~VRGW~~I~~FG~~T~~LD~~N~~T  
tr|A0A0U1UYX4|A0A0U1UYX4\_CVHSA RFLRF~~N~~TTLT~~W~~YNSWNQ.....AYSS~~P~~VLP~~F~~GHGVYF~~S~~TID~~K~~SN~~V~~VRGW~~I~~FG~~T~~LD~~N~~T  
tr|R9QTA0|R9QTA0\_CVHSA YFLPF~~N~~TNVT~~R~~YLSLNAQ~~N~~TIVY~~F~~DN~~H~~VIP~~F~~YDGIYF~~A~~AAT~~E~~RS~~N~~VIRGW~~I~~FG~~S~~T~~F~~DN~~R~~  
tr|A0A0K1Z074|A0A0K1Z074\_CVHSA YFLPF~~H~~SNLT~~Q~~YFSLNIDS~~D~~RYTY~~F~~DN~~P~~IL~~F~~GDGIYF~~A~~AAT~~E~~KSN~~V~~IRGW~~V~~FG~~S~~T~~F~~DN~~T~~  
sp|Q3LZX1|SPIKE\_BCHK3 YFLPF~~F~~DSNLT~~Q~~YFSLNIDS~~D~~RYTY~~F~~DN~~P~~IL~~F~~GDGIYF~~A~~AAT~~E~~KSN~~V~~IRGW~~V~~FG~~S~~T~~F~~DN~~T~~  
sp|Q3I5J5|SPIKE\_BCRP3 YFLPF~~F~~DSNLT~~Q~~YFSLNIDS~~D~~RYTY~~F~~DN~~P~~IL~~F~~GDGIYF~~A~~AAT~~E~~KSN~~V~~IRGW~~V~~FG~~S~~T~~F~~DN~~T~~  
sp|Q0Q475|SPIKE\_BC279 YFLPF~~F~~DSNLT~~Q~~YFSLNIDS~~D~~RYTY~~F~~DN~~P~~IL~~F~~GDGIYF~~A~~AAT~~E~~KSN~~V~~IRGW~~V~~FG~~S~~T~~F~~DN~~T~~  
tr|Q0QDX9|Q0QDX9\_CVHSA YFLPF~~F~~DSNLT~~Q~~YFSLNIDS~~D~~RYTY~~F~~DN~~P~~IL~~F~~GDGIYF~~A~~AAT~~E~~KSN~~V~~IRGW~~V~~FG~~S~~T~~F~~DN~~T~~  
tr|A0A2I4AL96|A0A2I4AL96\_9TELE .....  
tr|A0A1U7RHG6|A0A1U7RHG6\_MESAU .....  
tr|H0UY28|H0UY28\_CAVPO .....  
tr|A0A2K5QWK6|A0A2K5QWK6\_CEBCA .....  
tr|F6UG70|F6UG70\_CALJA .....

120 130 140 150 160 170  
sp|P0DTC2|SPIKE\_SARS2\_Spike\_gl TQSL~~L~~IVN~~N~~A~~N~~V~~V~~IK~~V~~CF~~F~~Q~~F~~CND~~P~~FLG~~V~~Y~~Y~~HK~~N~~NK~~S~~W~~M~~ES~~E~~FR~~V~~Y~~S~~S~~A~~N~~N~~CT~~F~~EY~~V~~S~~Q~~  
sp|P59594|SPIKE\_CVHSA SQSV~~I~~IINN~~S~~TN~~V~~IR~~A~~CN~~F~~EL~~C~~DN~~P~~FFA~~V~~SK~~P~~MGT...Q~~T~~H~~T~~M~~I~~FD~~N~~A~~F~~NCT~~F~~EY~~I~~SD  
tr|D2E1E7|D2E1E7\_CVHSA SQSV~~I~~IINN~~S~~TN~~V~~IR~~A~~CN~~F~~EL~~C~~DN~~P~~FFA~~V~~SK~~P~~MGT...Q~~T~~H~~T~~M~~I~~FD~~N~~A~~F~~NCT~~F~~EY~~I~~SD  
tr|D2E1D2|D2E1D2\_CVHSA SQSV~~I~~IINN~~S~~TN~~V~~IR~~A~~CN~~F~~EL~~C~~DN~~P~~FFA~~V~~SK~~P~~MGT...Q~~T~~H~~T~~M~~I~~FD~~N~~A~~F~~NCT~~F~~EY~~I~~SD  
tr|A0A166ZL64|A0A166ZL64\_9NIDO TQSA~~L~~LVN~~N~~GS~~A~~IT~~I~~EVC~~Y~~FQ~~F~~CND~~P~~FA~~I~~IS~~G~~.GA...Q~~N~~TA~~I~~Y~~I~~N~~L~~RNCT~~Y~~VD~~T~~LR  
tr|A0A0U1UYX4|A0A0U1UYX4\_CVHSA TQSA~~L~~LVN~~N~~GS~~A~~IT~~I~~EVC~~Y~~FQ~~F~~CND~~P~~FA~~I~~IS~~G~~.GA...Q~~N~~TA~~I~~Y~~I~~N~~L~~RNCT~~Y~~VD~~T~~LR  
tr|R9QTA0|R9QTA0\_CVHSA TQSA~~I~~IVN~~N~~TH~~I~~LV~~K~~V~~C~~FN~~L~~CKE~~P~~MYT~~V~~SR...N~~Q~~...H~~Y~~K~~S~~W~~V~~Y~~Q~~H~~A~~RNCT~~Y~~DV~~A~~Y~~P~~  
tr|A0A0K1Z074|A0A0K1Z074\_CVHSA TQSA~~I~~IVN~~N~~TH~~I~~IR~~V~~CV~~F~~N~~L~~CKE~~P~~MYT~~V~~SR...G~~T~~...Q~~I~~SSW~~V~~Y~~Q~~N~~A~~FNCT~~Y~~DR~~V~~E~~K~~  
sp|Q3LZX1|SPIKE\_BCHK3 TQSA~~I~~IVN~~N~~TH~~I~~IR~~V~~CV~~F~~N~~L~~CKE~~P~~MYT~~V~~SR...G~~T~~...Q~~I~~SSW~~V~~Y~~Q~~N~~A~~FNCT~~Y~~DR~~V~~E~~K~~  
sp|Q3I5J5|SPIKE\_BCRP3 TQSA~~I~~IVN~~N~~TH~~I~~IR~~V~~CV~~F~~N~~L~~CKE~~P~~MYT~~V~~SR...G~~T~~...Q~~I~~SSW~~V~~Y~~Q~~N~~A~~FNCT~~Y~~DR~~V~~E~~K~~  
sp|Q0Q475|SPIKE\_BC279 TQSA~~I~~IVN~~N~~TH~~I~~IR~~V~~CV~~F~~N~~L~~CKE~~P~~MYT~~V~~SR...G~~T~~...Q~~I~~SSW~~V~~Y~~Q~~N~~A~~FNCT~~Y~~DR~~V~~E~~K~~  
tr|Q0QDX9|Q0QDX9\_CVHSA TQSA~~I~~IVN~~N~~TH~~I~~IR~~V~~CV~~F~~N~~L~~CKE~~P~~MYT~~V~~SR...G~~T~~...Q~~I~~SSW~~V~~Y~~Q~~N~~A~~FNCT~~Y~~DR~~V~~E~~K~~  
tr|A0A2I4AL96|A0A2I4AL96\_9TELE .....  
tr|A0A1U7RHG6|A0A1U7RHG6\_MESAU .....  
tr|H0UY28|H0UY28\_CAVPO .....  
tr|A0A2K5QWK6|A0A2K5QWK6\_CEBCA .....  
tr|F6UG70|F6UG70\_CALJA .....

180 190 200 210 220  
sp|P0DTC2|SPIKE\_SARS2\_Spike\_gl PFL~~M~~DLE~~G~~K~~.~~QGN~~F~~K~~N~~LRE~~F~~V~~F~~K~~N~~ID~~G~~Y~~F~~K~~I~~Y~~S~~KHT~~P~~IN~~L~~V~~R~~...DL~~P~~QGF~~S~~A~~L~~E~~P~~L~~V~~D  
sp|P59594|SPIKE\_CVHSA AF~~S~~L~~D~~VSE~~K~~.SGN~~F~~K~~H~~LRE~~F~~V~~F~~K~~N~~KD~~G~~F~~L~~Y~~V~~Y~~K~~G~~Y~~Q~~P~~ID~~V~~V~~R~~...DL~~P~~SG~~F~~N~~T~~L~~K~~P~~I~~F~~K~~  
tr|D2E1E7|D2E1E7\_CVHSA AF~~S~~L~~D~~VSE~~K~~.SGN~~F~~K~~H~~LRE~~F~~V~~F~~K~~N~~KD~~G~~F~~L~~Y~~V~~Y~~K~~G~~Y~~Q~~P~~ID~~V~~V~~R~~...DL~~P~~SG~~F~~N~~T~~L~~K~~P~~I~~F~~K~~  
tr|D2E1D2|D2E1D2\_CVHSA AF~~S~~L~~D~~VSE~~K~~.SGN~~F~~K~~H~~LRE~~F~~V~~F~~K~~N~~KD~~G~~F~~L~~Y~~V~~Y~~K~~G~~Y~~Q~~P~~ID~~V~~V~~R~~...DL~~P~~SG~~F~~N~~T~~L~~K~~P~~I~~F~~K~~  
tr|A0A166ZL64|A0A166ZL64\_9NIDO DL~~P~~L~~S~~FAE~~.~~VDGG~~F~~K~~H~~LRE~~F~~V~~F~~K~~N~~SD~~G~~F~~L~~H~~I~~Y~~G~~A~~Y~~Q~~P~~YD~~L~~A~~I~~GATA~~A~~AL~~P~~AQ~~F~~LP~~L~~K~~P~~L~~W~~K  
tr|A0A0U1UYX4|A0A0U1UYX4\_CVHSA DL~~P~~L~~S~~FAE~~.~~VDGG~~F~~K~~H~~LRE~~F~~V~~F~~K~~N~~SD~~G~~F~~L~~H~~I~~Y~~G~~A~~Y~~Q~~P~~YD~~L~~A~~I~~GATA~~A~~AL~~P~~AQ~~F~~LP~~L~~K~~P~~L~~W~~K  
tr|R9QTA0|R9QTA0\_CVHSA SF~~Q~~L~~D~~VSL~~K~~NN~~V~~N~~F~~QH~~L~~RE~~F~~IF~~K~~N~~V~~D~~G~~F~~L~~K~~I~~Y~~S~~S~~Y~~E~~P~~IN~~V~~V~~S~~...GI~~P~~SG~~F~~SV~~L~~K~~P~~V~~M~~S  
tr|A0A0K1Z074|A0A0K1Z074\_CVHSA SF~~Q~~L~~D~~TAP~~K~~.TGN~~F~~K~~D~~LRE~~F~~V~~F~~K~~N~~RD~~G~~F~~T~~V~~Y~~Q~~Y~~T~~P~~VN~~L~~LR...GL~~P~~AG~~L~~SV~~L~~K~~P~~IL~~K~~  
sp|Q3LZX1|SPIKE\_BCHK3 SF~~Q~~L~~D~~TTP~~K~~.TGN~~F~~K~~D~~LRE~~F~~V~~F~~K~~N~~RD~~G~~F~~L~~S~~V~~Y~~Q~~Y~~T~~AVN~~L~~LR...GL~~P~~TG~~F~~SV~~L~~K~~P~~IL~~K~~  
sp|Q3I5J5|SPIKE\_BCRP3 SF~~Q~~L~~D~~TAP~~K~~.TGN~~F~~K~~D~~LRE~~F~~V~~F~~K~~N~~RD~~G~~F~~L~~S~~V~~Y~~Q~~Y~~T~~AVN~~L~~LR...GL~~P~~IG~~F~~SV~~L~~K~~P~~IL~~K~~  
sp|Q0Q475|SPIKE\_BC279 SF~~Q~~L~~D~~TAP~~K~~.TGN~~F~~K~~D~~LRE~~F~~V~~F~~K~~N~~RD~~G~~F~~L~~S~~V~~Y~~Q~~Y~~T~~AVN~~L~~LR...GL~~P~~AG~~F~~SV~~L~~K~~P~~IL~~K~~  
tr|Q0QDX9|Q0QDX9\_CVHSA SF~~Q~~L~~D~~TAP~~K~~.TGN~~F~~K~~D~~LRE~~F~~V~~F~~K~~N~~RD~~G~~F~~L~~S~~V~~Y~~Q~~Y~~T~~AVN~~L~~LR...GL~~P~~AG~~F~~SV~~L~~K~~P~~IL~~K~~  
tr|A0A2I4AL96|A0A2I4AL96\_9TELE .....  
tr|A0A1U7RHG6|A0A1U7RHG6\_MESAU .....  
tr|H0UY28|H0UY28\_CAVPO .....  
tr|A0A2K5QWK6|A0A2K5QWK6\_CEBCA .....  
tr|F6UG70|F6UG70\_CALJA .....









|                                | 950   | 960                                                    | 970 | 980 | 990 | 1000 |
|--------------------------------|-------|--------------------------------------------------------|-----|-----|-----|------|
| sp P0DTC2 SPIKE_SARS2_Spike_gl | QDVVN | NAQALNTLVKQLSSNFGAISSVLNDILSRDKVEAEVQIDRLITGRQLQSLQTYV |     |     |     |      |
| sp P59594 SPIKE_CVHSA          | QDVVN | NAQALNTLVKQLSSNFGAISSVLNDILSRDKVEAEVQIDRLITGRQLQSLQTYV |     |     |     |      |
| tr D2E1E7 D2E1E7_CVHSA         | QDVVN | NAQALNTLVKQLSSNFGAISSVLNDILSRDKVEAEVQIDRLITGRQLQSLQTYV |     |     |     |      |
| tr D2E1D2 D2E1D2_CVHSA         | QDVVN | NAQALNTLVKQLSSNFGAISSVLNDILSRDKVEAEVQIDRLITGRQLQSLQTYV |     |     |     |      |
| tr A0A166ZL64 A0A166ZL64_9NIDO | QDVVN | NAQALNTLVKQLSSNFGAISSALNDILSRDKVEAEVQIDRLITGRQLQSLQTYV |     |     |     |      |
| tr A0A0U1UYX4 A0A0U1UYX4_CVHSA | QDVVN | NAQALNTLVKQLSSNFGAISSALNDILSRDKVEAEVQIDRLITGRQLQSLQTYV |     |     |     |      |
| tr R9QTA0 R9QTA0_CVHSA         | QDVVN | NAQALNTLVKQLSSNFGAISSVLNDILSRDKVEAEVQIDRLITGRQLQSLQTYV |     |     |     |      |
| tr A0A0K1Z074 A0A0K1Z074_CVHSA | QDVVN | NAQALNTLVKQLSSNFGAISSVLNDILSRDKVEAEVQIDRLITGRQLQSLQTYV |     |     |     |      |
| sp Q3LZX1 SPIKE_BCHK3          | QDVVN | NAQALNTLVKQLSSNFGAISSVLNDILSRDKVEAEVQIDRLITGRQLQSLQTYV |     |     |     |      |
| sp Q3I5J5 SPIKE_BCRP3          | QDVVN | NAQALNTLVKQLSSNFGAISSVLNDILSRDKVEAEVQIDRLITGRQLQSLQTYV |     |     |     |      |
| sp Q0Q475 SPIKE_BC279          | QDVVN | NAQALNTLVKQLSSNFGAISSVLNDILSRDKVEAEVQIDRLITGRQLQSLQTYV |     |     |     |      |
| tr Q0QDX9 Q0QDX9_CVHSA         | QDVVN | NAQALNTLVKQLSSNFGAISSVLNDILSRDKVEAEVQIDRLITGRQLQSLQTYV |     |     |     |      |
| tr A0A2I4AL96 A0A2I4AL96_9TELE |       |                                                        |     |     |     |      |
| tr A0A1U7RHG6 A0A1U7RHG6_MESAU |       |                                                        |     |     |     |      |
| tr H0UY28 H0UY28_CAVPO         |       |                                                        |     |     |     |      |
| tr A0A2K5QWK6 A0A2K5QWK6_CEBCA |       |                                                        |     |     |     |      |
| tr F6UG70 F6UG70_CALJA         |       |                                                        |     |     |     |      |

|                                | 1010                                            | 1020           | 1030 | 1040 | 1050 | 1060 |
|--------------------------------|-------------------------------------------------|----------------|------|------|------|------|
| sp P0DTC2 SPIKE_SARS2_Spike_gl | TQQLIRAAEIRASANLAATKMSECVLGQSKRVDFCGKGYHLMSPFPQ | SAPHGVVFLHVTYV |      |      |      |      |
| sp P59594 SPIKE_CVHSA          | TQQLIRAAEIRASANLAATKMSECVLGQSKRVDFCGKGYHLMSPFPQ | SAPHGVVFLHVTYV |      |      |      |      |
| tr D2E1E7 D2E1E7_CVHSA         | TQQLIRAAEIRASANLAATKMSECVLGQSKRVDFCGKGYHLMSPFPQ | SAPHGVVFLHVTYV |      |      |      |      |
| tr D2E1D2 D2E1D2_CVHSA         | TQQLIRAAEIRASANLAATKMSECVLGQSKRVDFCGKGYHLMSPFPQ | SAPHGVVFLHVTYV |      |      |      |      |
| tr A0A166ZL64 A0A166ZL64_9NIDO | TQQLIRAAEIRASANLAATKMSECVLGQSKRVDFCGKGYHLMSPFPQ | SAPHGVVFLHVTYV |      |      |      |      |
| tr A0A0U1UYX4 A0A0U1UYX4_CVHSA | TQQLIRAAEIRASANLAATKMSECVLGQSKRVDFCGKGYHLMSPFPQ | SAPHGVVFLHVTYV |      |      |      |      |
| tr R9QTA0 R9QTA0_CVHSA         | TQQLIRAAEIRASANLAATKMSECVLGQSKRVDFCGKGYHLMSPFPQ | SAPHGVVFLHVTYV |      |      |      |      |
| tr A0A0K1Z074 A0A0K1Z074_CVHSA | TQQLIRAAEIRASANLAATKMSECVLGQSKRVDFCGKGYHLMSPFPQ | SAPHGVVFLHVTYV |      |      |      |      |
| sp Q3LZX1 SPIKE_BCHK3          | TQQLIRAAEIRASANLAATKMSECVLGQSKRVDFCGKGYHLMSPFPQ | SAPHGVVFLHVTYV |      |      |      |      |
| sp Q3I5J5 SPIKE_BCRP3          | TQQLIRAAEIRASANLAATKMSECVLGQSKRVDFCGKGYHLMSPFPQ | SAPHGVVFLHVTYV |      |      |      |      |
| sp Q0Q475 SPIKE_BC279          | TQQLIRAAEIRASANLAATKMSECVLGQSKRVDFCGKGYHLMSPFPQ | SAPHGVVFLHVTYV |      |      |      |      |
| tr Q0QDX9 Q0QDX9_CVHSA         | TQQLIRAAEIRASANLAATKMSECVLGQSKRVDFCGKGYHLMSPFPQ | SAPHGVVFLHVTYV |      |      |      |      |
| tr A0A2I4AL96 A0A2I4AL96_9TELE |                                                 |                |      |      |      |      |
| tr A0A1U7RHG6 A0A1U7RHG6_MESAU |                                                 |                |      |      |      |      |
| tr H0UY28 H0UY28_CAVPO         |                                                 |                |      |      |      |      |
| tr A0A2K5QWK6 A0A2K5QWK6_CEBCA |                                                 |                |      |      |      |      |
| tr F6UG70 F6UG70_CALJA         |                                                 |                |      |      |      |      |

|                                | 1070                             | 1080                         | 1090 | 1100 | 1110 | 1120 |
|--------------------------------|----------------------------------|------------------------------|------|------|------|------|
| sp P0DTC2 SPIKE_SARS2_Spike_gl | PAQEKNFTTAPAI CHEGKAYFPREGVFSNGT | HWFTQRNFYSPQIITTDNTFVSGNCDV  |      |      |      |      |
| sp P59594 SPIKE_CVHSA          | PSQERNFTTAPAI CHEGKAYFPREGVFSNGT | SWFITQRNFYSPQIITTDNTFVSGNCDV |      |      |      |      |
| tr D2E1E7 D2E1E7_CVHSA         | PSQERNFTTAPAI CHEGKAYFPREGVFSNGT | SWFITQRNFYSPQIITTDNTFVSGNCDV |      |      |      |      |
| tr D2E1D2 D2E1D2_CVHSA         | PSQERNFTTAPAI CHEGKAYFPREGVFSNGT | SWFITQRNFYSPQIITTDNTFVSGNCDV |      |      |      |      |
| tr A0A166ZL64 A0A166ZL64_9NIDO | PAQEKNFTTAPAI CHEGKAYFPREGVFSNGS | WFTQRNFYSPQIITTDNTFVAGSCDV   |      |      |      |      |
| tr A0A0U1UYX4 A0A0U1UYX4_CVHSA | PAQEKNFTTAPAI CHEGKAYFPREGVFSNGS | WFTQRNFYSPQIITTDNTFVAGSCDV   |      |      |      |      |
| tr R9QTA0 R9QTA0_CVHSA         | PSQERNFTTAPAI CHEGKAYFPREGVFSNGT | SWFITQRNFYSPQIITTDNTFVAGSCNV |      |      |      |      |
| tr A0A0K1Z074 A0A0K1Z074_CVHSA | PSQEKNFTTAPAI CHEGKAYFPREGVFSNGT | SWFITQRNFYSPQIITTDNTFVAGNCDV |      |      |      |      |
| sp Q3LZX1 SPIKE_BCHK3          | PSQEKNFTTAPAI CHEGKAYFPREGVFSNGT | SWFITQRNFYSPQLITTDNTFVSGNCDV |      |      |      |      |
| sp Q3I5J5 SPIKE_BCRP3          | PSQERNFTTAPAI CHEGKAYFPREGVFSNGT | SWFITQRNFYSPQIITTDNTFVAGSCDV |      |      |      |      |
| sp Q0Q475 SPIKE_BC279          | PSQERNFTTAPAI CHEGKAYFPREGVFSNGT | SWFITQRNFYSPQIITTDNTFVAGNCDV |      |      |      |      |
| tr Q0QDX9 Q0QDX9_CVHSA         | PSQERNFTTAPAI CHEGKAYFPREGVFSNGT | SWFITQRNFYSPQIITTDNTFVAGNCDV |      |      |      |      |
| tr A0A2I4AL96 A0A2I4AL96_9TELE |                                  |                              |      |      |      |      |
| tr A0A1U7RHG6 A0A1U7RHG6_MESAU |                                  |                              |      |      |      |      |
| tr H0UY28 H0UY28_CAVPO         |                                  |                              |      |      |      |      |
| tr A0A2K5QWK6 A0A2K5QWK6_CEBCA |                                  |                              |      |      |      |      |
| tr F6UG70 F6UG70_CALJA         |                                  |                              |      |      |      |      |

|                                | 1130                  | 1140                       | 1150        | 1160 | 1170 | 1180 |
|--------------------------------|-----------------------|----------------------------|-------------|------|------|------|
| sp P0DTC2 SPIKE_SARS2_Spike_gl | VIGIINNTVYDPLQPELDSFK | EELDKYFKNHTSPDVLGDIGSINASV | NIQKEIDRLNE |      |      |      |
| sp P59594 SPIKE_CVHSA          | VIGIINNTVYDPLQPELDSFK | EELDKYFKNHTSPDVLGDIGSINASV | NIQKEIDRLNE |      |      |      |
| tr D2E1E7 D2E1E7_CVHSA         | VIGIINNTVYDPLQPELDSFK | EELDKYFKNHTSPDVLGDIGSINASV | NIQKEIDRLNE |      |      |      |
| tr D2E1D2 D2E1D2_CVHSA         | VIGIINNTVYDPLQPELDSFK | EELDKYFKNHTSPDVLGDIGSINASV | NIQKEIDRLNE |      |      |      |
| tr A0A166ZL64 A0A166ZL64_9NIDO | VIGIINNTVYDPLQPELDSFK | QELDKYFKNHTSPDVLGDIGSINASV | NIQKEIDRLNE |      |      |      |
| tr A0A0U1UYX4 A0A0U1UYX4_CVHSA | VIGIINNTVYDPLQPELDSFK | QELDKYFKNHTSPDVLGDIGSINASV | NIQKEIDRLNE |      |      |      |
| tr R9QTA0 R9QTA0_CVHSA         | VIGIINNTVYDPLQPELDSFK | EELDKYFKNHTSPDVLGDIGSINASV | NIQKEIDRLNE |      |      |      |
| tr A0A0K1Z074 A0A0K1Z074_CVHSA | VIGIINNTVYDPLQPELDSFK | EELDKYFKNHTSPDVLGDIGSINASV | NIQKEIDRLNE |      |      |      |
| sp Q3LZX1 SPIKE_BCHK3          | VIGIINNTVYDPLQPELDSFK | EELDKYFKNHTSPDVLGDIGSINASV | NIQKEIDRLNE |      |      |      |
| sp Q3I5J5 SPIKE_BCRP3          | VIGIINNTVYDPLQPELDSFK | EELDKYFKNHTSPDVLGDIGSINASV | NIQKEIDRLNE |      |      |      |
| sp Q0Q475 SPIKE_BC279          | VIGIINNTVYDPLQPELDSFK | EELDKYFKNHTSPDVLGDIGSINASV | NIQKEIDRLNE |      |      |      |
| tr Q0QDX9 Q0QDX9_CVHSA         | VIGIINNTVYDPLQPELDSFK | EELDKYFKNHTSPDVLGDIGSINASV | NIQKEIDRLNE |      |      |      |
| tr A0A2I4AL96 A0A2I4AL96_9TELE |                       |                            |             |      |      |      |
| tr A0A1U7RHG6 A0A1U7RHG6_MESAU |                       |                            |             |      |      |      |
| tr H0UY28 H0UY28_CAVPO         |                       |                            |             |      |      |      |
| tr A0A2K5QWK6 A0A2K5QWK6_CEBCA |                       |                            |             |      |      | A    |
| tr F6UG70 F6UG70_CALJA         |                       |                            |             |      |      |      |

|                                | 1190                    | 1200  | 1210  | 1220                 | 1230    |
|--------------------------------|-------------------------|-------|-------|----------------------|---------|
| sp P0DTC2 SPIKE_SARS2_Spike_gl | VAKNLNESLIDLQELGKYEQYIK | ..... | ..... | WPWYIWLGFIAGLIAI     | VMVTIML |
| sp P59594 SPIKE_CVHSA          | VAKNLNESLIDLQELGKYEQYIK | ..... | ..... | WPWYVWLGFIAGLIAI     | VMVTILL |
| tr D2E1E7 D2E1E7_CVHSA         | VAKNLNESLIDLQELGKYEQYIK | ..... | ..... | WPWYVWLGFIAGLIAI     | VMVTILL |
| tr D2E1D2 D2E1D2_CVHSA         | VAKNLNESLIDLQELGKYEQYIK | ..... | ..... | WPWYVWLGFIAGLIAI     | VMVTILL |
| tr A0A166ZL64 A0A166ZL64_9NIDO | VAKNLNESLIDLQELGKYEQYIK | ..... | ..... | WPWYVWLGFIAGLVGLFMAI | ILL     |
| tr A0A0U1UYX4 A0A0U1UYX4_CVHSA | VAKNLNESLIDLQELGKYEQYIK | ..... | ..... | WPWYVWLGFIAGLVGLFMAI | ILL     |
| tr R9QTA0 R9QTA0_CVHSA         | VAKNLNESLIDLQELGKYEQYIK | ..... | ..... | WPWYVWLGFIAGLIAI     | VMVTILL |
| tr A0A0K1Z074 A0A0K1Z074_CVHSA | VAKNLNDSLIDLQELGKYEQYIK | ..... | ..... | WPWYVWLGFIAGLVGLFMAI | ILL     |
| sp Q3LZX1 SPIKE_BCHK3          | VAKNLNESLIDLQELGKYEQYIK | ..... | ..... | WPWYVWLGFIAGLIAI     | VMVTILL |
| sp Q3I5J5 SPIKE_BCRP3          | VAKNLNESLIDLQELGKYEQYIK | ..... | ..... | WPWYVWLGFIAGLIAI     | VMVTILL |
| sp Q0Q475 SPIKE_BC279          | VAKNLNESLIDLQELGKYEQYIK | ..... | ..... | WPWYVWLGFIAGLIAI     | VMVTILL |
| tr Q0QDX9 Q0QDX9_CVHSA         | VAKNLNESLIDLQELGKYEQYIK | ..... | ..... | WPWYVWLGFIAGLIAI     | VMVTILL |
| tr A0A2I4AL96 A0A2I4AL96_9TELE | .....                   | ..... | ..... | .....                | .....   |
| tr A0A1U7RHG6 A0A1U7RHG6_MESAU | .....                   | ..... | ..... | MGCCPGDCL            | .....   |
| tr H0UY28 H0UY28_CAVPO         | .....                   | ..... | ..... | .....                | .....   |
| tr A0A2K5QWK6 A0A2K5QWK6_CEBCA | VA..APEAVA              | XC    | GC    | GC                   | GC      |
| tr F6UG70 F6UG70_CALJA         | .....                   | ..... | ..... | .....                | .....   |

|                                | 1240             | 1250  | 1260                | 1270  |
|--------------------------------|------------------|-------|---------------------|-------|
| sp P0DTC2 SPIKE_SARS2_Spike_gl | C.CMT.SCCSCLKGAC | ..... | SCGSCCKFDEDDSEPVKGV | KLH   |
| sp P59594 SPIKE_CVHSA          | C.CMT.SCCSCLKGAC | ..... | SCGSCCKFDEDDSEPVKGV | KLH   |
| tr D2E1E7 D2E1E7_CVHSA         | C.CMT.SCCSCLKGAC | ..... | SCGSCCKFDEDDSEPVKGV | KLH   |
| tr D2E1D2 D2E1D2_CVHSA         | C.CMT.SCCSCLKGAC | ..... | SCGSCCKFDEDDSEPVKGV | KLH   |
| tr A0A166ZL64 A0A166ZL64_9NIDO | C.YFT.SCCSCLKGAC | ..... | SCGSCCKFDEDDSEPVKGV | KLH   |
| tr A0A0U1UYX4 A0A0U1UYX4_CVHSA | C.YFT.SCCSCLKGAC | ..... | SCGSCCKFDEDDSEPVKGV | KLH   |
| tr R9QTA0 R9QTA0_CVHSA         | C.CMT.SCCSCLKGAC | ..... | SCGSCCKFDEDDSEPVKGV | KLH   |
| tr A0A0K1Z074 A0A0K1Z074_CVHSA | C.YFT.SCCSCLKGAC | ..... | SCGSCCKFDEDDSEPVKGV | KLH   |
| sp Q3LZX1 SPIKE_BCHK3          | C.CMT.SCCSCLKGAC | ..... | SCGSCCKFDEDDSEPVKGV | KLH   |
| sp Q3I5J5 SPIKE_BCRP3          | C.CMT.SCCSCLKGAC | ..... | SCGSCCKFDEDDSEPVKGV | KLH   |
| sp Q0Q475 SPIKE_BC279          | C.CMT.SCCSCLKGAC | ..... | SCGSCCKFDEDDSEPVKGV | KLH   |
| tr Q0QDX9 Q0QDX9_CVHSA         | C.CMT.SCCSCLKGAC | ..... | SCGSCCKFDEDDSEPVKGV | KLH   |
| tr A0A2I4AL96 A0A2I4AL96_9TELE | .....            | ..... | .....               | ..... |
| tr A0A1U7RHG6 A0A1U7RHG6_MESAU | .....            | ..... | .....               | ..... |
| tr H0UY28 H0UY28_CAVPO         | CC               | CV    | PAC                 | SC    |
| tr A0A2K5QWK6 A0A2K5QWK6_CEBCA | CC               | CV    | PAC                 | SC    |
| tr F6UG70 F6UG70_CALJA         | CC               | CV    | PAC                 | SC    |

|                                |       |       |       |       |
|--------------------------------|-------|-------|-------|-------|
| sp P0DTC2 SPIKE_SARS2_Spike_gl | YT    | ..... | ..... | ..... |
| sp P59594 SPIKE_CVHSA          | YT    | ..... | ..... | ..... |
| tr D2E1E7 D2E1E7_CVHSA         | YT    | ..... | ..... | ..... |
| tr D2E1D2 D2E1D2_CVHSA         | YT    | ..... | ..... | ..... |
| tr A0A166ZL64 A0A166ZL64_9NIDO | YT    | ..... | ..... | ..... |
| tr A0A0U1UYX4 A0A0U1UYX4_CVHSA | YT    | ..... | ..... | ..... |
| tr R9QTA0 R9QTA0_CVHSA         | YT    | ..... | ..... | ..... |
| tr A0A0K1Z074 A0A0K1Z074_CVHSA | YT    | ..... | ..... | ..... |
| sp Q3LZX1 SPIKE_BCHK3          | YT    | ..... | ..... | ..... |
| sp Q3I5J5 SPIKE_BCRP3          | YT    | ..... | ..... | ..... |
| sp Q0Q475 SPIKE_BC279          | YT    | ..... | ..... | ..... |
| tr Q0QDX9 Q0QDX9_CVHSA         | YT    | ..... | ..... | ..... |
| tr A0A2I4AL96 A0A2I4AL96_9TELE | ..... | ..... | ..... | ..... |
| tr A0A1U7RHG6 A0A1U7RHG6_MESAU | CC    | GS    | SG    | CG    |
| tr H0UY28 H0UY28_CAVPO         | CC    | GS    | CG    | CG    |
| tr A0A2K5QWK6 A0A2K5QWK6_CEBCA | CC    | GS    | CG    | CG    |
| tr F6UG70 F6UG70_CALJA         | CC    | GS    | CG    | CG    |

|                                |       |       |       |       |
|--------------------------------|-------|-------|-------|-------|
| sp P0DTC2 SPIKE_SARS2_Spike_gl | ..... | ..... | ..... | ..... |
| sp P59594 SPIKE_CVHSA          | ..... | ..... | ..... | ..... |
| tr D2E1E7 D2E1E7_CVHSA         | ..... | ..... | ..... | ..... |
| tr D2E1D2 D2E1D2_CVHSA         | ..... | ..... | ..... | ..... |
| tr A0A166ZL64 A0A166ZL64_9NIDO | ..... | ..... | ..... | ..... |
| tr A0A0U1UYX4 A0A0U1UYX4_CVHSA | ..... | ..... | ..... | ..... |
| tr R9QTA0 R9QTA0_CVHSA         | ..... | ..... | ..... | ..... |
| tr A0A0K1Z074 A0A0K1Z074_CVHSA | ..... | ..... | ..... | ..... |
| sp Q3LZX1 SPIKE_BCHK3          | ..... | ..... | ..... | ..... |
| sp Q3I5J5 SPIKE_BCRP3          | ..... | ..... | ..... | ..... |
| sp Q0Q475 SPIKE_BC279          | ..... | ..... | ..... | ..... |
| tr Q0QDX9 Q0QDX9_CVHSA         | ..... | ..... | ..... | ..... |
| tr A0A2I4AL96 A0A2I4AL96_9TELE | LQ    | SC    | CL    | QSC   |
| tr A0A1U7RHG6 A0A1U7RHG6_MESAU | ..... | ..... | ..... | ..... |
| tr H0UY28 H0UY28_CAVPO         | CK    | PCC   | QSS   | CC    |
| tr A0A2K5QWK6 A0A2K5QWK6_CEBCA | CK    | PCC   | QSS   | CC    |
| tr F6UG70 F6UG70_CALJA         | CK    | PCC   | QSS   | CC    |

```

sp|P0DTC2|SPIKE_SARS2_Spike_gl .....
sp|P59594|SPIKE_CVHSA .....
tr|D2E1E7|D2E1E7_CVHSA .....
tr|D2E1D2|D2E1D2_CVHSA .....
tr|A0A166ZL64|A0A166ZL64_9NIDO .....
tr|A0A0U1UYX4|A0A0U1UYX4_CVHSA .....
tr|R9QTA0|R9QTA0_CVHSA .....
tr|A0A0K1Z074|A0A0K1Z074_CVHSA .....
sp|Q3LZX1|SPIKE_BCHK3 .....
sp|Q3I5J5|SPIKE_BCRP3 .....
sp|Q0Q475|SPIKE_BC279 .....
tr|Q0QDX9|Q0QDX9_CVHSA .....
tr|A0A2I4AL96|A0A2I4AL96_9TELE CCSCCLQSCCLQSCCLQSCCLQS
tr|A0A1U7RHG6|A0A1U7RHG6_MESAU .....
tr|H0UY28|H0UY28_CAVPO CCQCKI.....
tr|A0A2K5QWK6|A0A2K5QWK6_CEBCA CCQCKI.....
tr|F6UG70|F6UG70_CALJA CCQCKI.....

```
